# Supplementary material for: Relevance of Platinum-free Interval and BRCA Reversion Mutations for Veliparib Monotherapy after Progression on Carboplatin/Paclitaxel for gBRCA Advanced Breast Cancer (BROCADE3 Crossover)
Source: PubMed Central journal article supplement — Clin Cancer Res. 2021 Jun 15;27(18):4983–93. doi: 10.1158/1078-0432.CCR-21-0748 (PMC9401555; doi:10.1158/1078-0432.ccr-21-0748), 2021-06-15
Supplement: 10780432ccr210748-sup-261399_2_supp_7129615_qdc34y.pdf [file 10780432ccr210748-sup-261399_2_supp_7129615_qdc34y.pdf]

Figure S4

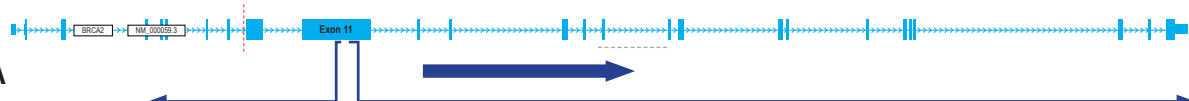

A

|                                             |                                                                                                                                                                                                                                                                                       |                                                                                                                                                                                                                                                                                      |    |
|---------------------------------------------|---------------------------------------------------------------------------------------------------------------------------------------------------------------------------------------------------------------------------------------------------------------------------------------|--------------------------------------------------------------------------------------------------------------------------------------------------------------------------------------------------------------------------------------------------------------------------------------|----|
| <b>Patient 3 (Reversion 2)</b>              | Reference genome<br>(Chr13: 32,914,415 - 32,914,520)<br>C1975 - Q2009                                                                                                                                                                                                                 | t g t g g g a t t t t a g c a c a g c a a g t g g a a a t c t g t c c a g g t a t c a g a t g c t t c a t t a c a a a c g c a a g a c a a g t g t t t c t g a a a t a g a a g a t a g t a c c a a g c a a g<br>C G I F S T A S G K S V Q V S D A S L Q N A R Q V F S E I E D S T K Q | WT |
| Pre-treatment cDNA<br>(Primary mutation)    | t g t g g g a t t t t a g c a c a g c a a g t g g a a a t c t g t c c a g g t a t c a g a t g c t t c a t t a c a a a c g c a a g a c a a g t g t t t c t g a a a t a g a a g a t a g t a c c a a g c a a g<br>C G I F S T A R E N L S R Y Q M L H Y K T Q D K C F L K STOP - - - - - | LOF                                                                                                                                                                                                                                                                                  |    |
| Cycle 3 cDNA                                | t g t g g g a t t t t a g c a c a g c a a g t g g a a a t c t g t c c a g g t a t c a g a t g c t t c a t t a c a a a c g c a a g a c a a g t g t t t c t g a a a t a g a a g a t a g t a c c a a g c a a g<br>C G I F S T A R E N L S R Y Q M L H Y K T Q D K C F L K STOP - - - - - | LOF                                                                                                                                                                                                                                                                                  |    |
| Progression cDNA<br>(Reversion mutation #1) | t g t g g g a t t t t a g c a c a g c a a g t g g a a a t c t g t c c a g g t a t c a g a t g c t t c a t t a c a a a c g c - - - - - a a g a t a g t a c c a a g c a a g<br>C G I F S T A R E N L S R Y Q M L H Y K T - - - - - Q D N T K Q                                          | Restored ORF                                                                                                                                                                                                                                                                         |    |
| Progression cDNA<br>(Reversion mutation #2) | t g t g g g a t t t t a g c a c a g c a a g t g g a a a t c t g t c c a g g t a t c a g a t g c t t c a t t a c a a a c g c a a g A T G C A T a c a a g t g t t t c t g a a a t a g a a g a t a g t a c c<br>C G I F S T A R E N L S R Y Q M L H Y K T Q D A L Q V F S E I E D S T    | Restored ORF                                                                                                                                                                                                                                                                         |    |
| Progression cDNA<br>(Reversion mutation #3) | t g t g g g a t t t t a g c a c a g c a a g t g g a a a t c t g t c c a g g t a t c a g a t g c t t c a t t a c a a a c g c a a g A T G C c a a g t g t t t c t g a a a t a g a a g a t a g t a c c a a g<br>C G I F S T A R E N L S R Y Q M L H Y K T Q D A Q V F S E I E D S T K    | Restored ORF                                                                                                                                                                                                                                                                         |    |

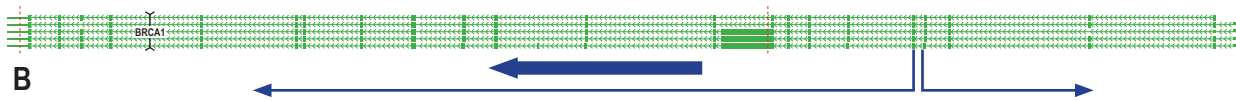

B

|                                          |                                                                                                                                         |                                                                                                                                                |             |
|------------------------------------------|-----------------------------------------------------------------------------------------------------------------------------------------|------------------------------------------------------------------------------------------------------------------------------------------------|-------------|
| <b>Patient 4</b>                         | Reference genome<br>(Chr17: 41,256,174 - 41,256,226)<br>K119 - K135                                                                     | a a a a g a t g a a g t t t c t a t c a t c c a a a g t a t g g g c t a c a g a a a c c g t g c c a a a a<br>K D E V S I I Q S M G Y R N R A K | WT function |
| Pre-treatment cDNA<br>(Primary mutation) | a a a a g a t g a a g t t t c t a t c a t c c a a a g t a t g g g c t a A a g a a a c c g t g c c a a a a<br>K D E V S I I Q S M G STOP | LOF                                                                                                                                            |             |
| Cycle 3 cDNA                             | a a a a g a t g a a g t t t c t a t c a t c c a a a g t a t g g g c t a A a g a a a c c g t g c c a a a a<br>K D E V S I I Q S M G STOP | LOF                                                                                                                                            |             |
| Progression cDNA<br>(Reversion mutation) | a a a a g a t g a a g t t t c t a - - - - - a c c g t g c c a a a a<br>K D E V S - - - - - N R A K                                      | Restored function                                                                                                                              |             |

**A** Insertion    - DNA bp deletion    **A** Single base change    - Amino acid deletion    **STOP** Stop codon
