# Supplementary figures and images for: Relevance of Platinum-free Interval and BRCA Reversion Mutations for Veliparib Monotherapy after Progression on Carboplatin/Paclitaxel for gBRCA Advanced Breast Cancer (BROCADE3 Crossover)
Source: PubMed Central journal article supplement — Clin Cancer Res. 2021 Jun 15;27(18):4983–93. doi: 10.1158/1078-0432.CCR-21-0748 (PMC9401555; doi:10.1158/1078-0432.ccr-21-0748), 2021-06-15

Figure S2

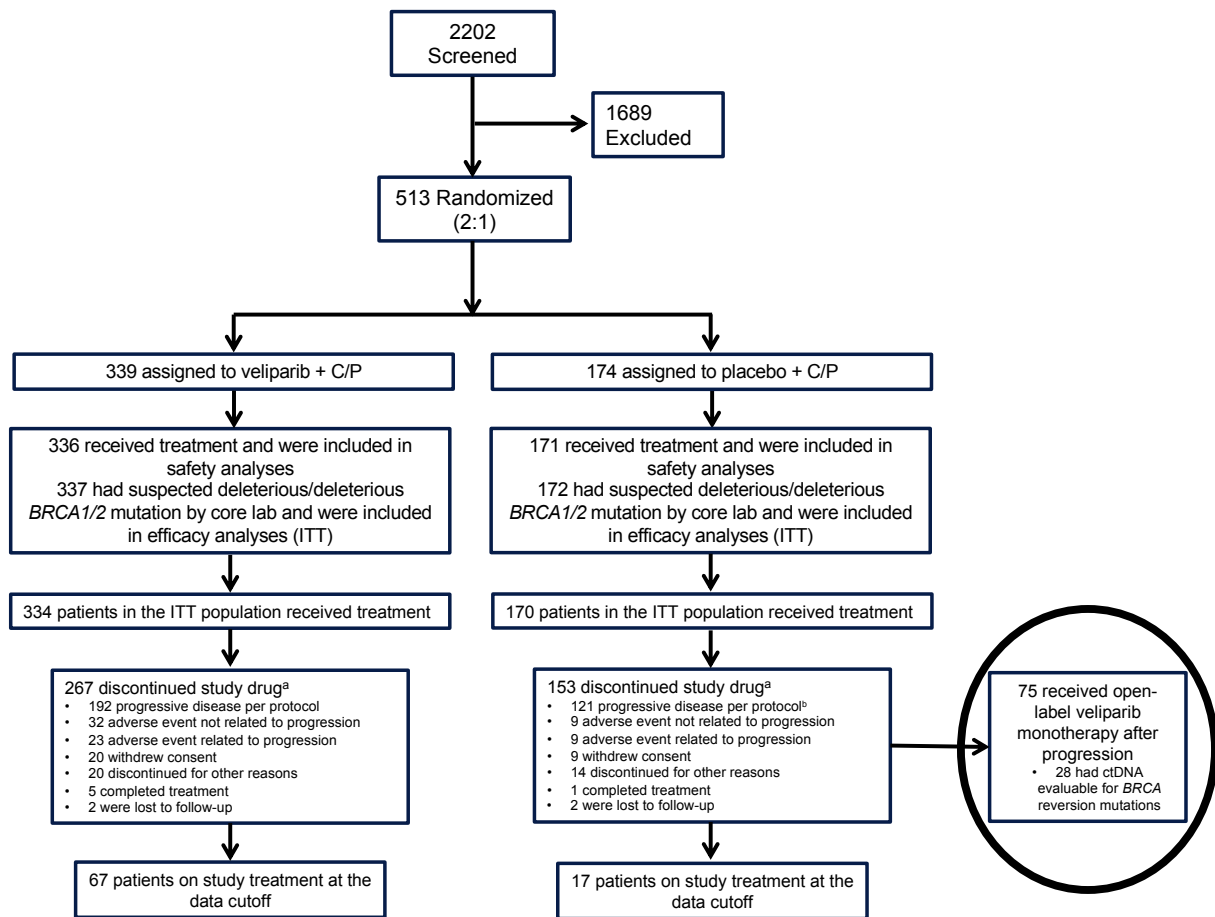

Supplement: 10780432ccr210748-sup-261399_2_supp_7129613_qtc3tr.pdf [file 10780432ccr210748-sup-261399_2_supp_7129613_qtc3tr.pdf]

Figure S3

A

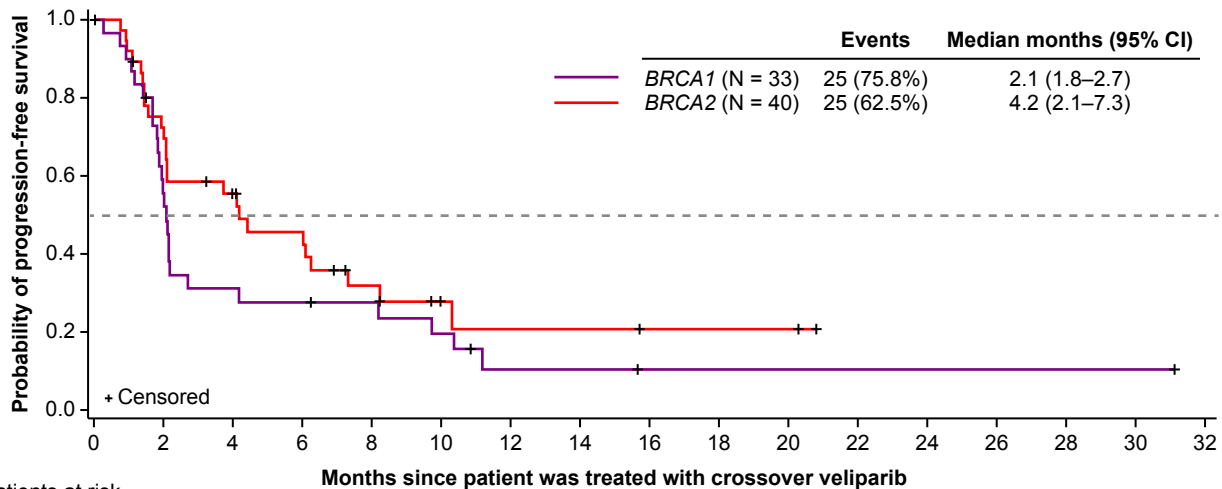

Patients at risk

|       |    |    |    |    |   |   |   |   |   |   |   |   |   |   |   |   |   |
|-------|----|----|----|----|---|---|---|---|---|---|---|---|---|---|---|---|---|
| BRCA1 | 33 | 16 | 9  | 8  | 7 | 5 | 2 | 2 | 1 | 1 | 1 | 1 | 1 | 1 | 1 | 1 | 0 |
| BRCA2 | 40 | 26 | 18 | 14 | 8 | 4 | 3 | 3 | 2 | 2 | 2 | 0 |   |   |   |   |   |

B

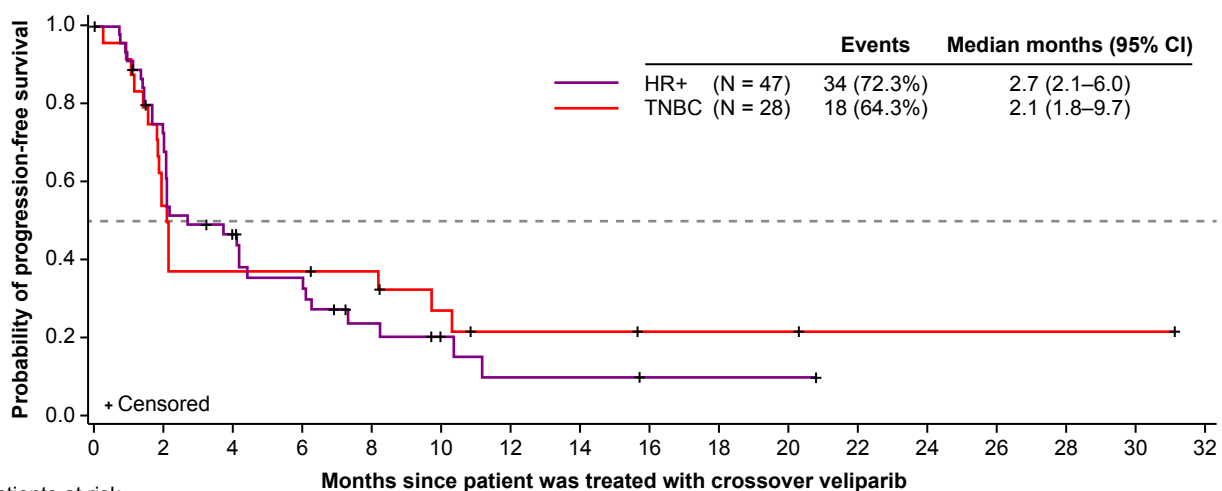

Patients at risk

|      |    |    |    |    |   |   |   |   |   |   |   |   |   |   |   |   |   |
|------|----|----|----|----|---|---|---|---|---|---|---|---|---|---|---|---|---|
| HR+  | 47 | 31 | 18 | 13 | 7 | 4 | 2 | 2 | 1 | 1 | 1 | 0 |   |   |   |   |   |
| TNBC | 28 | 13 | 9  | 9  | 8 | 5 | 3 | 3 | 2 | 2 | 2 | 1 | 1 | 1 | 1 | 1 | 0 |

Supplement: 10780432ccr210748-sup-261399_2_supp_7129614_qvc34y.pdf [file 10780432ccr210748-sup-261399_2_supp_7129614_qvc34y.pdf]

**Figure S1**

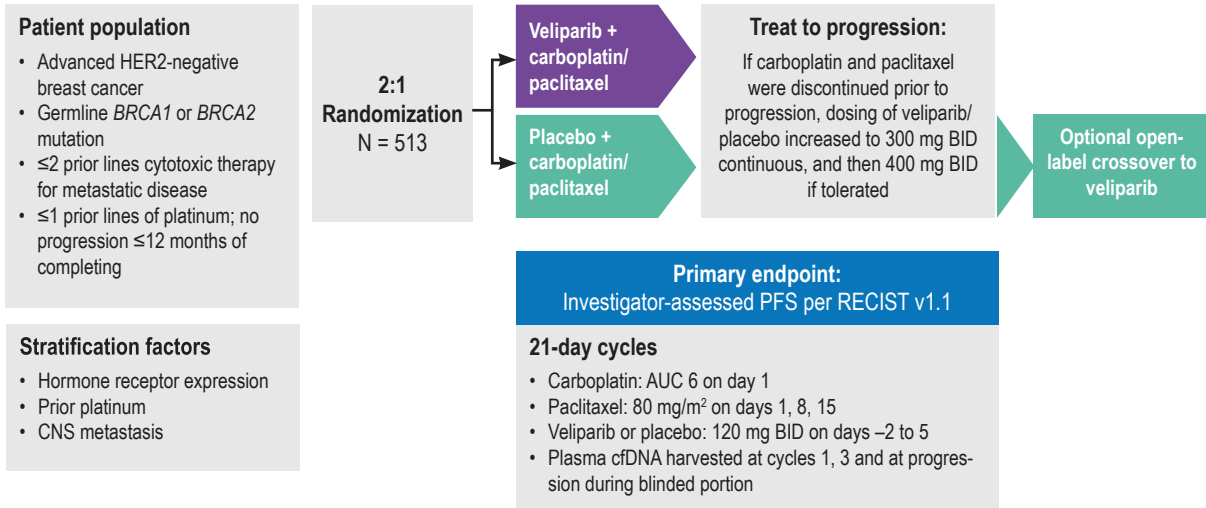

Supplement: 10780432ccr210748-sup-261399_2_supp_7129616_qkc34y.pdf [file 10780432ccr210748-sup-261399_2_supp_7129616_qkc34y.pdf]
